# Supplementary material for: Impaired human immunodeficiency virus type 1 replicative fitness in atypical viremic non-progressor individuals
Source: PubMed Central journal article supplement (PMC5359922; doi:10.1186/s12981-017-0144-0), 2017-03-20
Supplement: 12981_2017_144_MOESM1_ESM.pdf [file 12981_2017_144_MOESM1_ESM.pdf]

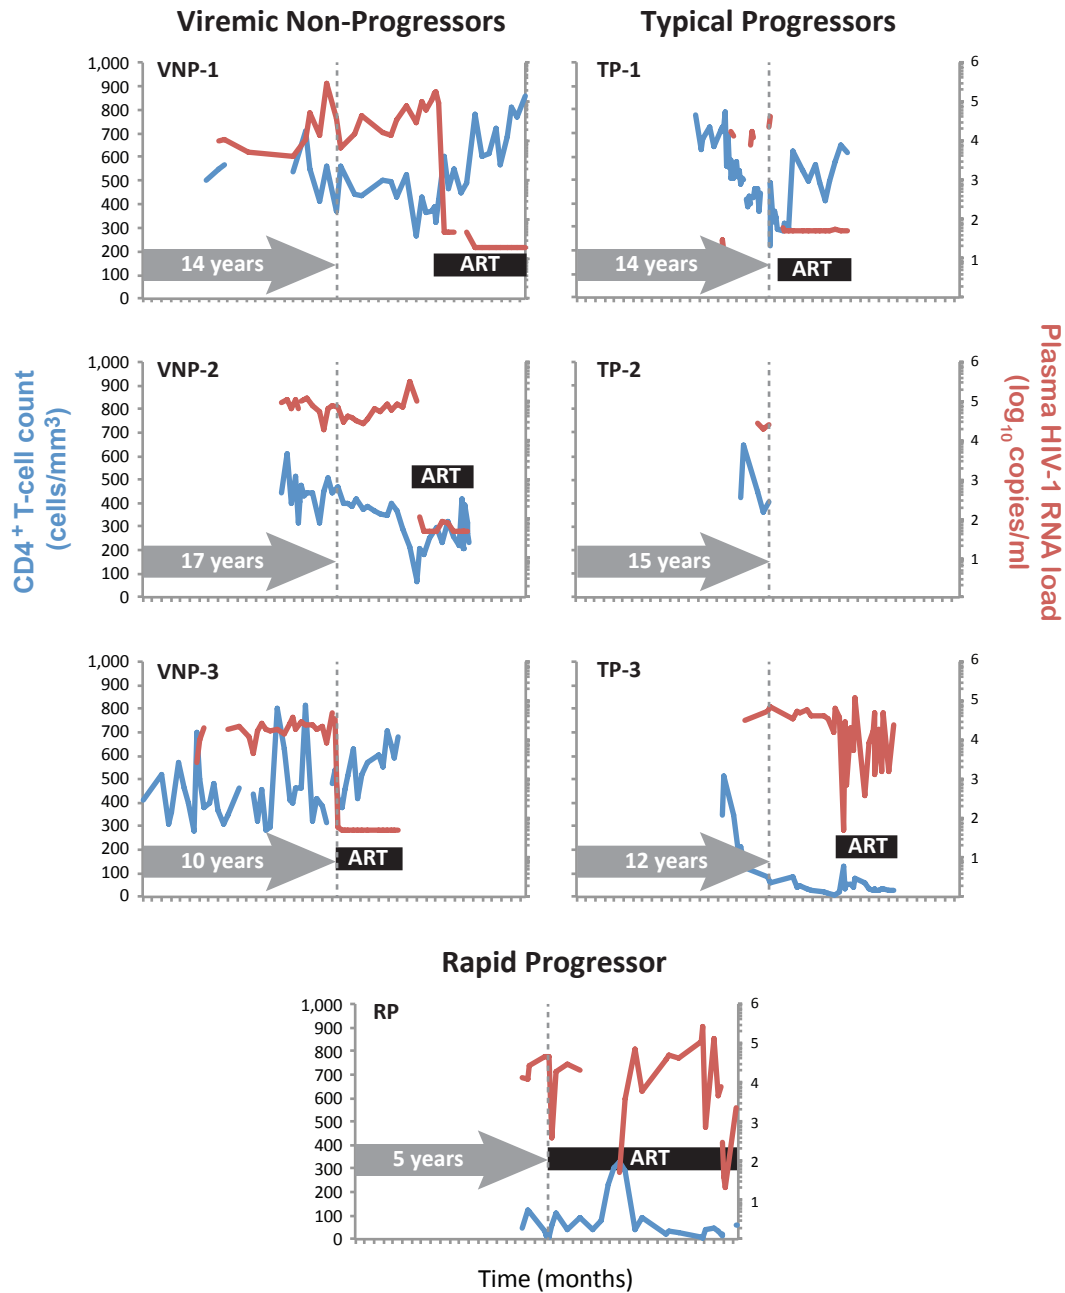

**Supplementary Figure 1.** CD4<sup>+</sup> T-cell counts and plasma HIV-1 RNA load values available for all seven patients described in this study. Vertical dashed lines indicate the time of sampling. Grey arrows depict the number of years since primary HIV-1 infection. The period of time the patients were under antiretroviral treatment (ART) is indicated by black boxes.
