# Supplementary material for: Impaired human immunodeficiency virus type 1 replicative fitness in atypical viremic non-progressor individuals
Source: PubMed Central journal article supplement (PMC5359922; doi:10.1186/s12981-017-0144-0), 2017-03-20
Supplement: 12981_2017_144_MOESM3_ESM.pdf [file 12981_2017_144_MOESM3_ESM.pdf]

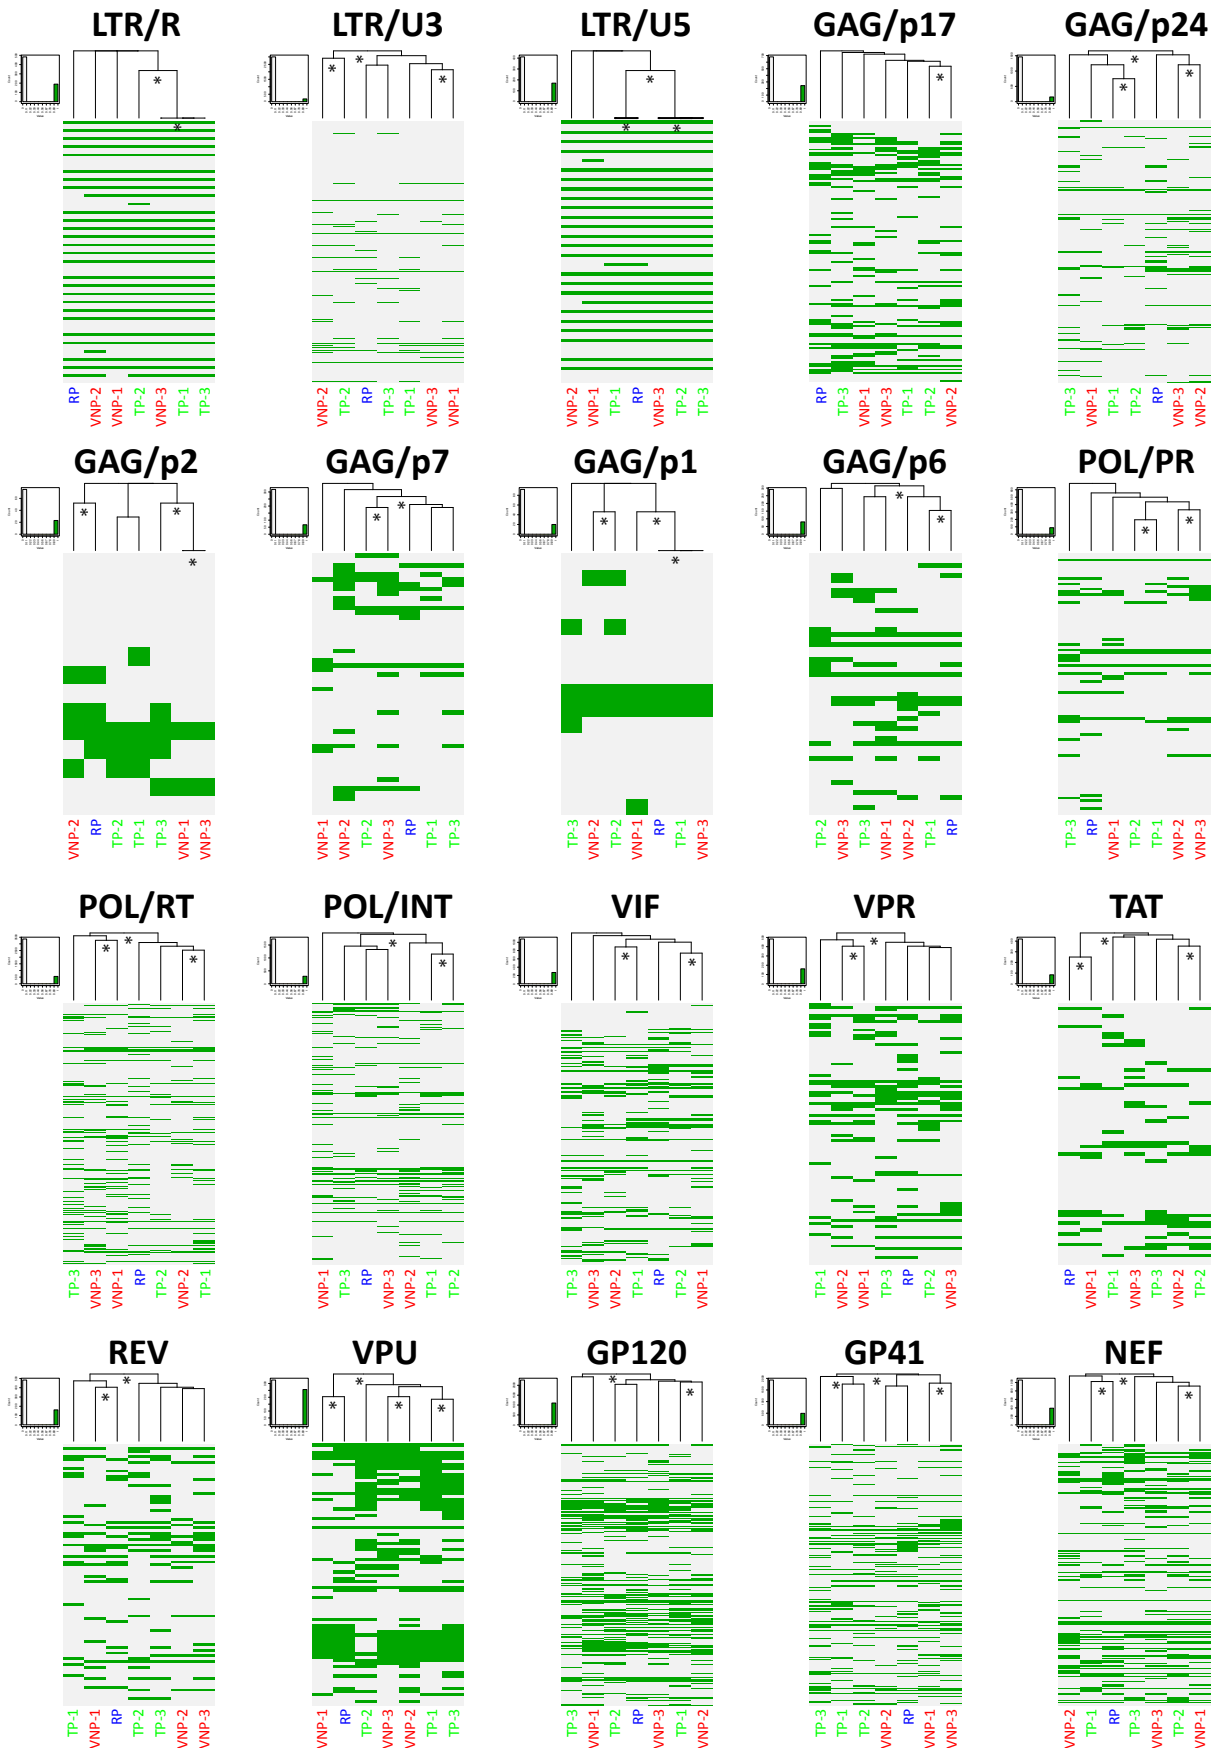

**Supplementary Figure 3.** Hierarchical clustering analysis of single nucleotide polymorphisms (SNPs) in all HIV-1 coding regions plus the long-terminal regions (LTRs). Dendrograms were calculated using the Euclidian distance and Complete cluster methods with 1000 bootstrap iterations as described in Los Alamos HIV Sequence Database (<http://www.hiv.lanl.gov/content/sequence/HEATMAP/heatmap.html>). Bootstrap values >60% are indicated by an asterisk. Green and grey blocks indicate the presence and absence of SNPs, respectively.
